# Supplementary material for: Interrogation of solution conformation of complex macrocyclic peptides utilizing a combined SEC-HDX-MS, circular dichroism, and NMR workflow
Source: Royal Society of Chemistry journal article supplement (doi:10.1039/d1an01619a), 2021-12-07
Supplement: d1an01619a1.pdf [file d1an01619a1.pdf]

# Interrogation of Solution Conformation of Complex Macrocyclic Peptides Utilizing a Combined SEC-HDX-MS, Circular Dichroism, and NMR Workflow

Donovon A. Adressa\*, Mikhail Reibarkh\*, Yuan Jiang, Josep Saurí, Alexey A. Makarov\*

Analytical Research & Development, Merck & Co. Inc., Rahway, New Jersey 07065, United States

## Supplementary Information

### Table of Contents

|                                                                                                                                                                                    |      |
|------------------------------------------------------------------------------------------------------------------------------------------------------------------------------------|------|
| <b>General Information</b> .....                                                                                                                                                   | S-3  |
| <b>SEC-HDX-MS spectra</b> .....                                                                                                                                                    | S-3  |
| i. Figure S1. SEC-HDX-MS spectra for <b>1</b>                                                                                                                                      |      |
| ii. Figure S2. SEC-HDX-MS spectra for <b>2</b>                                                                                                                                     |      |
| iii. Figure S3. SEC-HDX-MS spectra for <b>3</b>                                                                                                                                    |      |
| iv. Figure S4. SEC-HDX-MS spectra for <b>4</b>                                                                                                                                     |      |
| v. Figure S5. SEC-HDX-MS spectra for <b>5</b>                                                                                                                                      |      |
| vi. Figure S6. SEC-HDX-MS spectra for <b>6</b>                                                                                                                                     |      |
| <b>SEC-HDX-MS spectra</b> .....                                                                                                                                                    | S-9  |
| vii. Figure S7. CD spectra for <b>1-6</b> with 10% acetonitrile                                                                                                                    |      |
| viii. Figure S8. CD spectra for <b>1-6</b> with 30% acetonitrile                                                                                                                   |      |
| ix. Figure S9. CD spectra for <b>1-6</b> with 50% acetonitrile                                                                                                                     |      |
| <b>NMR spectra</b> .....                                                                                                                                                           | S-12 |
| x. Figure S10. Structure with assignment key for <b>1</b>                                                                                                                          |      |
| xi. Figure S11. <sup>1</sup> H spectra using excitation sculpting for water suppression of <b>1</b>                                                                                |      |
| xii. Figure S12. <sup>1</sup> H spectra using excitation sculpting for water suppression of <b>1</b> zoomed to the amide NH region with <sup>3</sup> J <sub>NH/H-α</sub> indicated |      |
| xiii. Figure S13. Broadband homo-decoupled ME-HSQC using presaturation for water suppression of <b>1</b>                                                                           |      |

- xiv. Figure S14. TOCSY spectra using excitation sculpting for water suppression of **1**
- xv. Figure S15. ROESY spectra using excitation sculpting for water suppression of **1**
- xvi. Figure S16. ROESY spectra using excitation sculpting for water suppression of **1** zoomed to the amide region
- xvii. Figure S17. ROESY spectra using excitation sculpting for water suppression of **1** zoomed to the NH  $\alpha$ -H/aliphatic intersection

**Experimentally derived NMR restraints** .....S-20

- xxviii. Table ST1. ForceGen restraints derived from NOESY
- xix. Table ST2. ForceGen restraints derived from with  $^3J_{\text{NH/H-}\alpha}$
- xx. Table ST3. ForceGen constraint violation report

**Modeled solution structures** .....S-22

- xxi. Figure S18. Lowest total energy structures resulting from ForceGen restrained conformational search, ribbon representation
- xxii. Figure S19. Lowest total energy structures resulting from ForceGen restrained conformational search, line bond representation

**SEC-HDX-MS bradykinin control studies** .....S-24

- xxiii. Figure S20. Structure of bradykinin and table of exchangeable protons
- xxiv. Figure S21. Plot of HDX vs elution time and percent acetonitrile mobile phase for bradykinin SEC-HDX-MS experiments
- xxv. Figures S22-24. Spectra of SEC-HDX-MS experiments on bradykinin

**VT-NMR Experiments** .....S-29

- xxvi. Figure S25.  $^1\text{H}/^{15}\text{N}$ -HSQC spectra of peptide **1** at four temperatures
- xxvii. Table ST4. Table of temperature coefficients for peptide **1**

**References** .....S-30

## General Information

Acetonitrile- $d_3$  was purchased from Cambridge Isotope Laboratories, Inc. and used as received.

All NMR spectra were recorded on a 600 MHz and referenced to the acetonitrile  $d_3$  signal with a Bruker Avance HD III console equipped with a Prodigy TCI CryoProbe at the temperature indicated on the spectra. All NMR chemical shifts are reported in parts per million (ppm) relative Acetonitrile- $d_3$ , 1.94 ppm for  $^1\text{H}$  NMR and 29.84 ppm for  $^{13}\text{C}$  NMR. Coupling constants are reported in Hz. All data were analyzed using MestReNova v12.1 (Mestrelab Research S.L.).

High-resolution mass spectrometry (HRMS) data were recorded on a Waters Acquity UPLC equipped with diode array detector and a Xevo G2-XS Qtof MS instrument in ESI+ (electrospray) ionization mode.

Figure S1. SEC-HDX-MS spectra for peptide 1

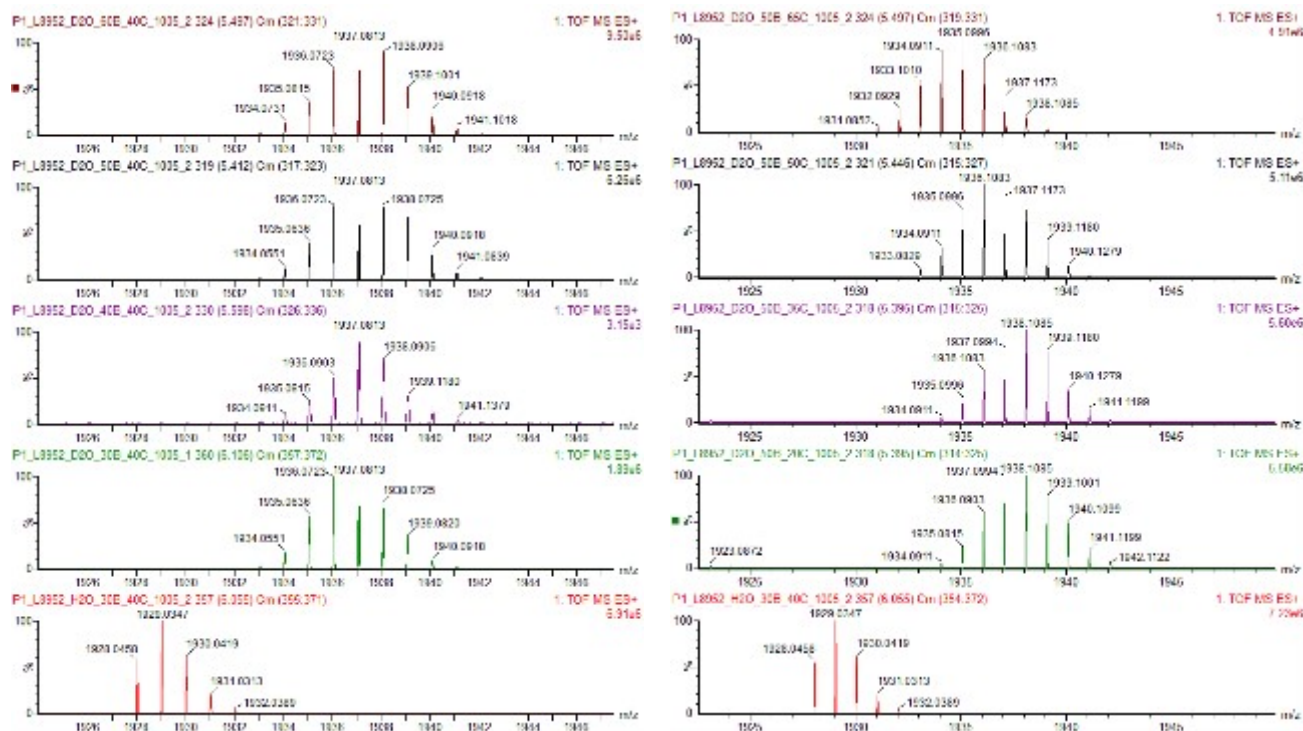

Figure S2. SEC-HDX-MS spectra for peptide 2

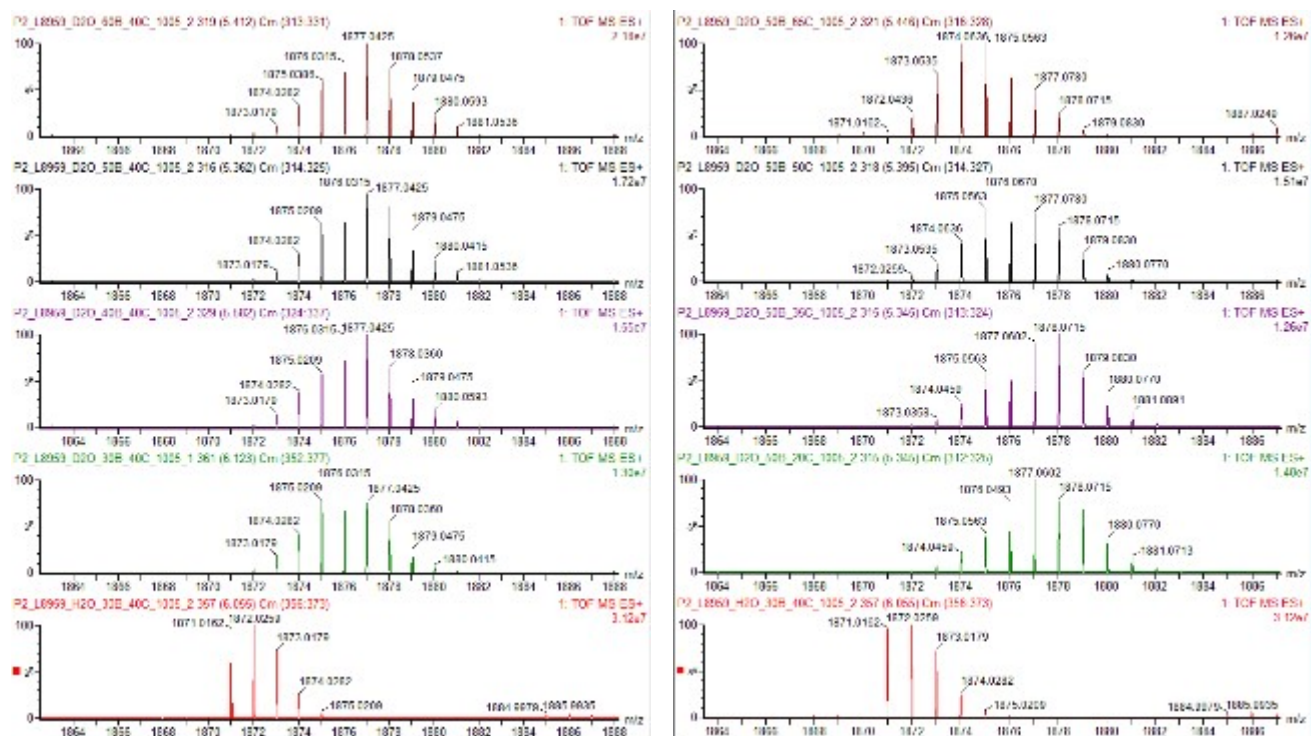

Figure S3. SEC-HDX-MS spectra for peptide 3

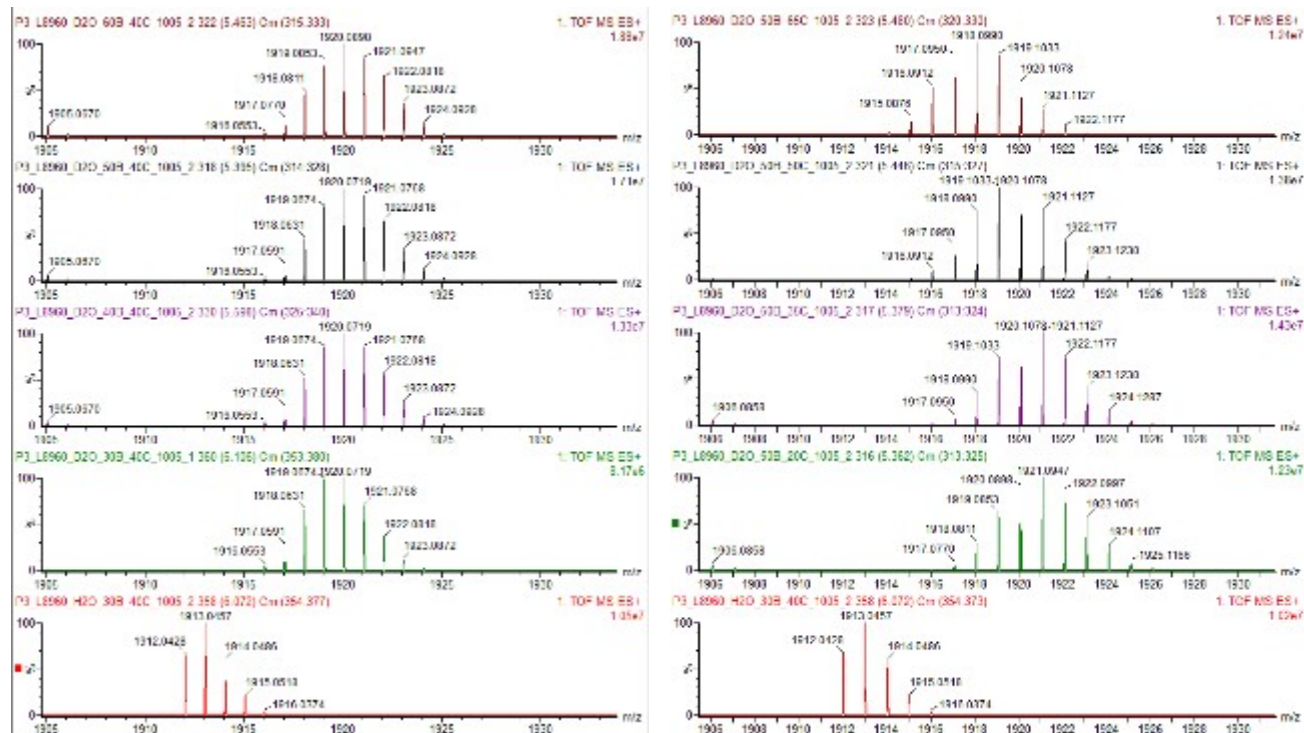

Figure S4. SEC-HDX-MS spectra for peptide 4

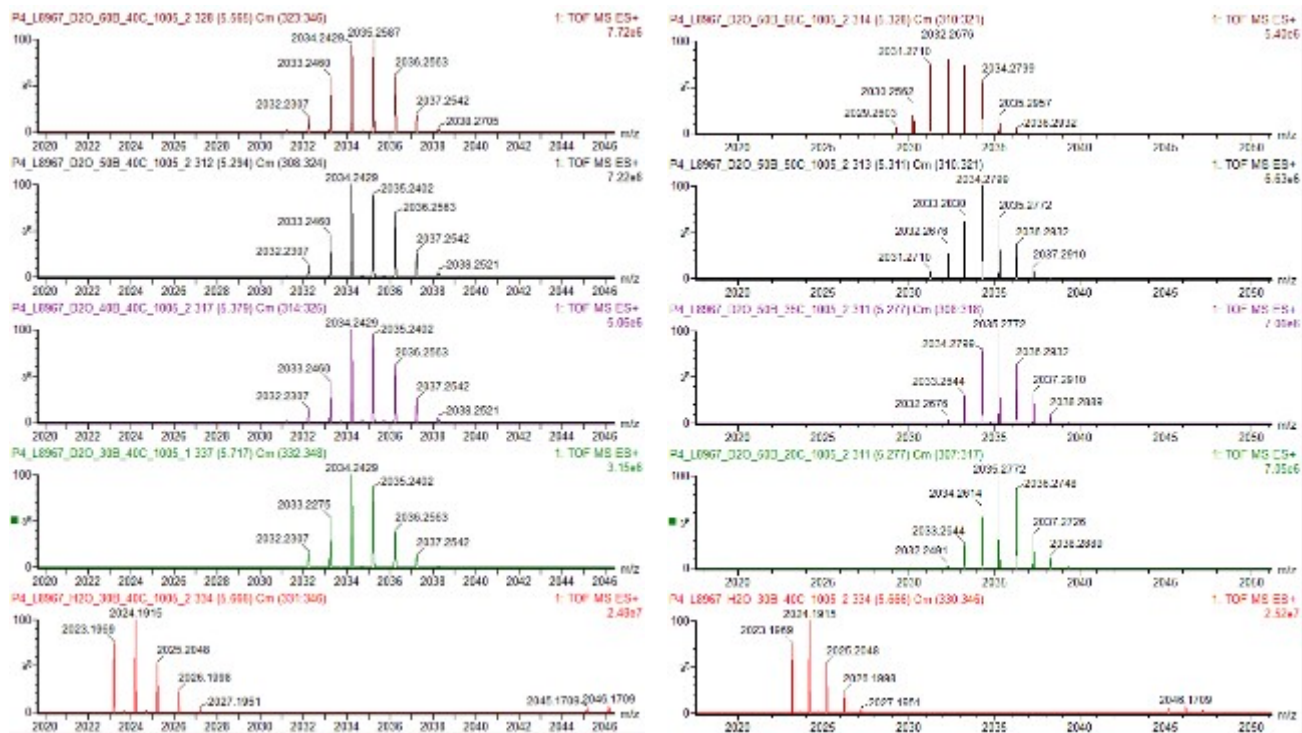



Figure S5. SEC-HDX-MS spectra for peptide 5

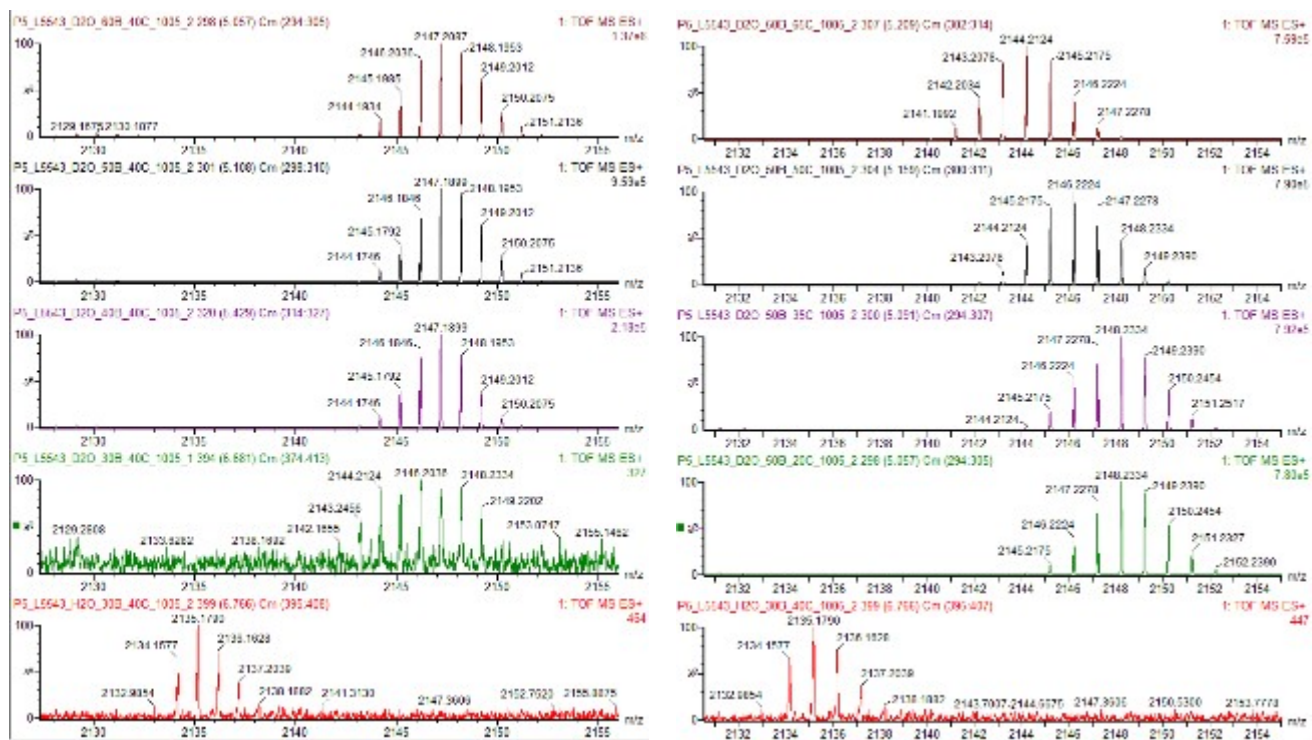

Figure S6. SEC-HDX-MS spectra for peptide 6

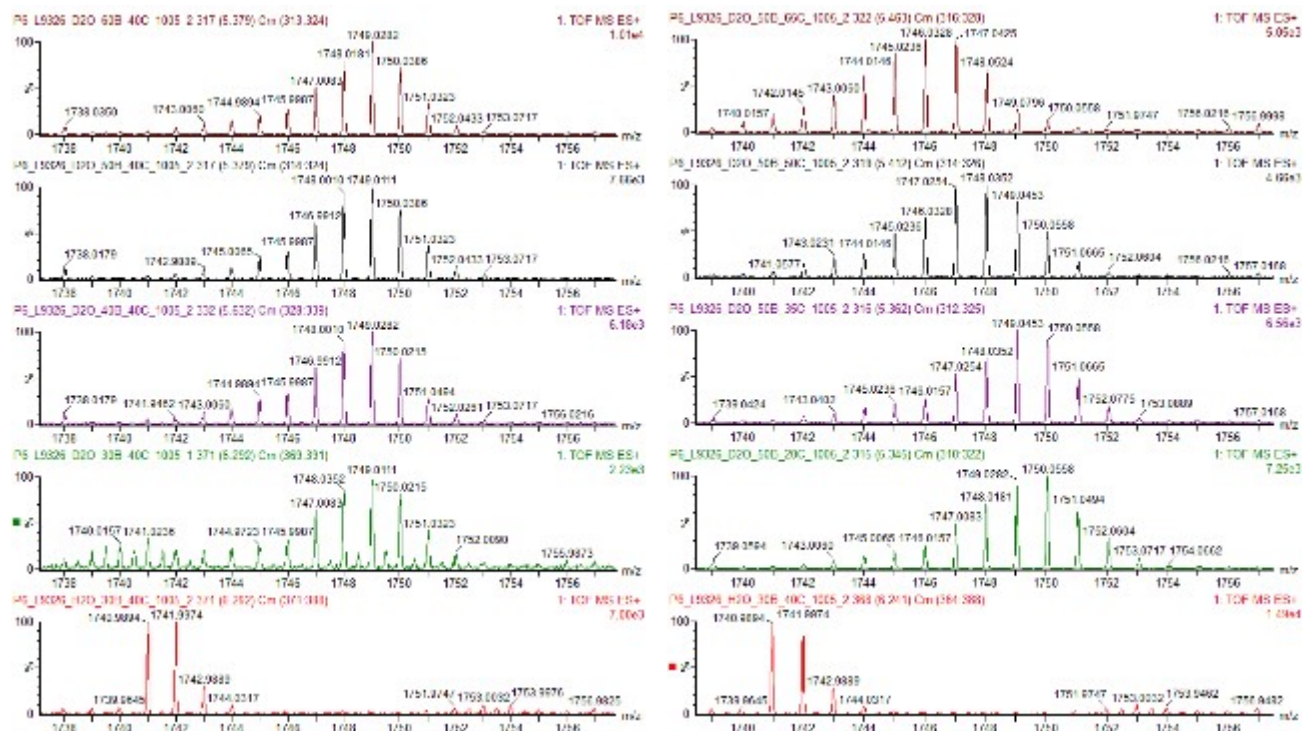



Figure S7. CD spectra of 10 % organic modifier for peptide 1-6

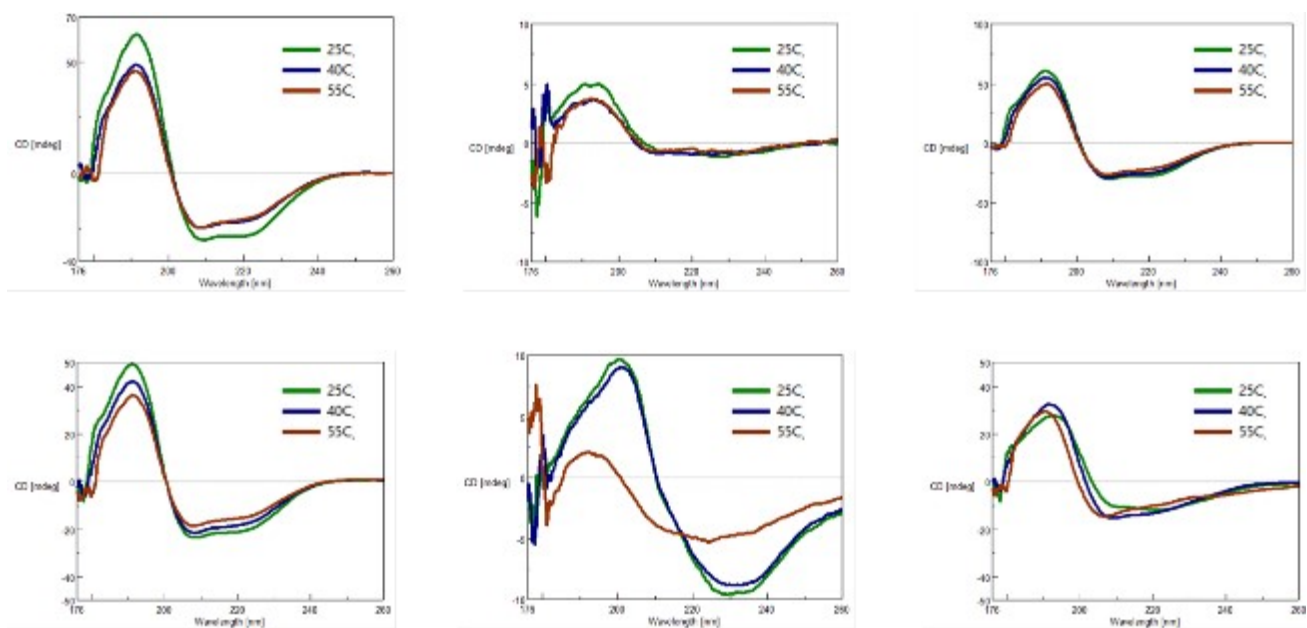

Figure S8. CD spectra of 30 % organic modifier for peptide 1-6

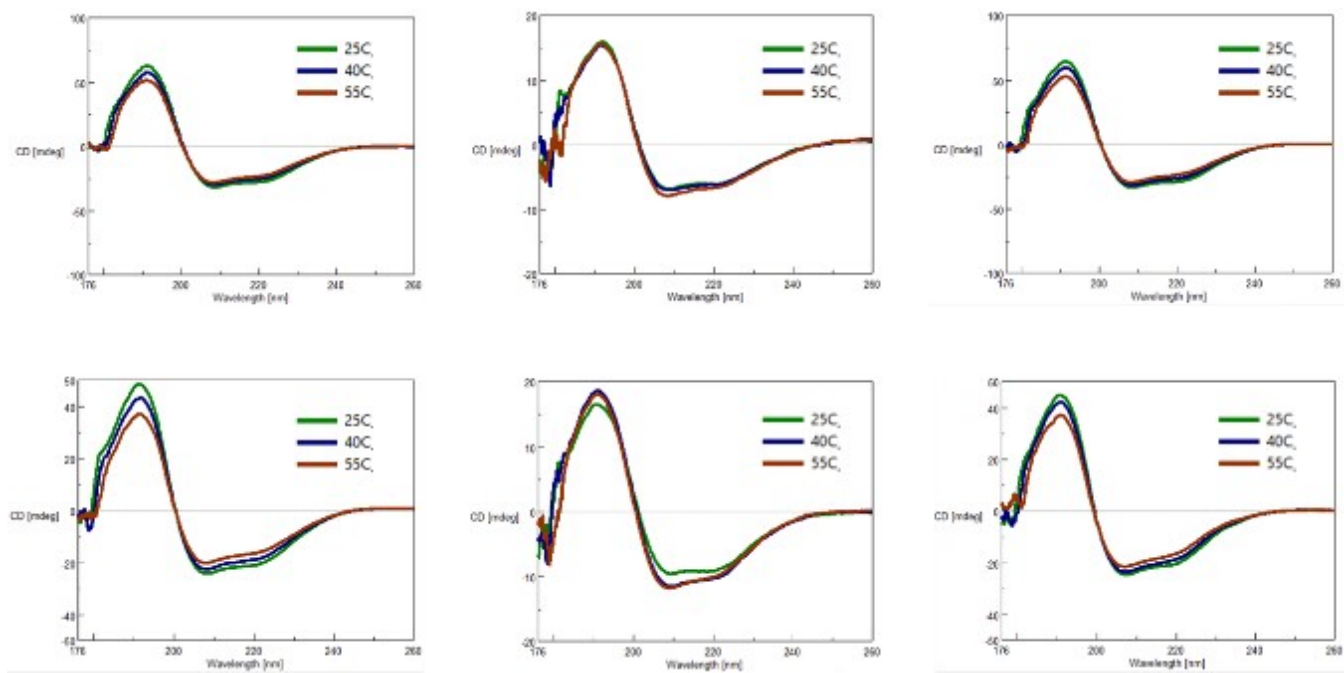

Figure S9. CD spectra of 50 % organic modifier for peptide 1-6

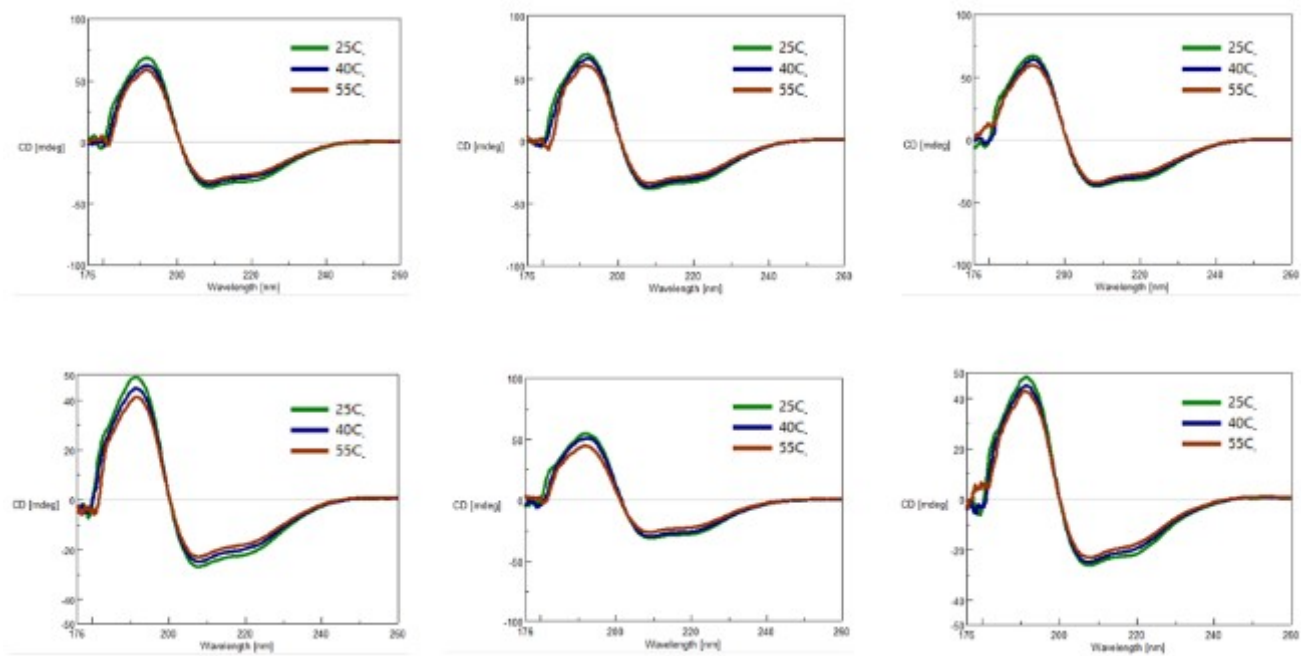

Figure S10. Structure with assignment key for **1**

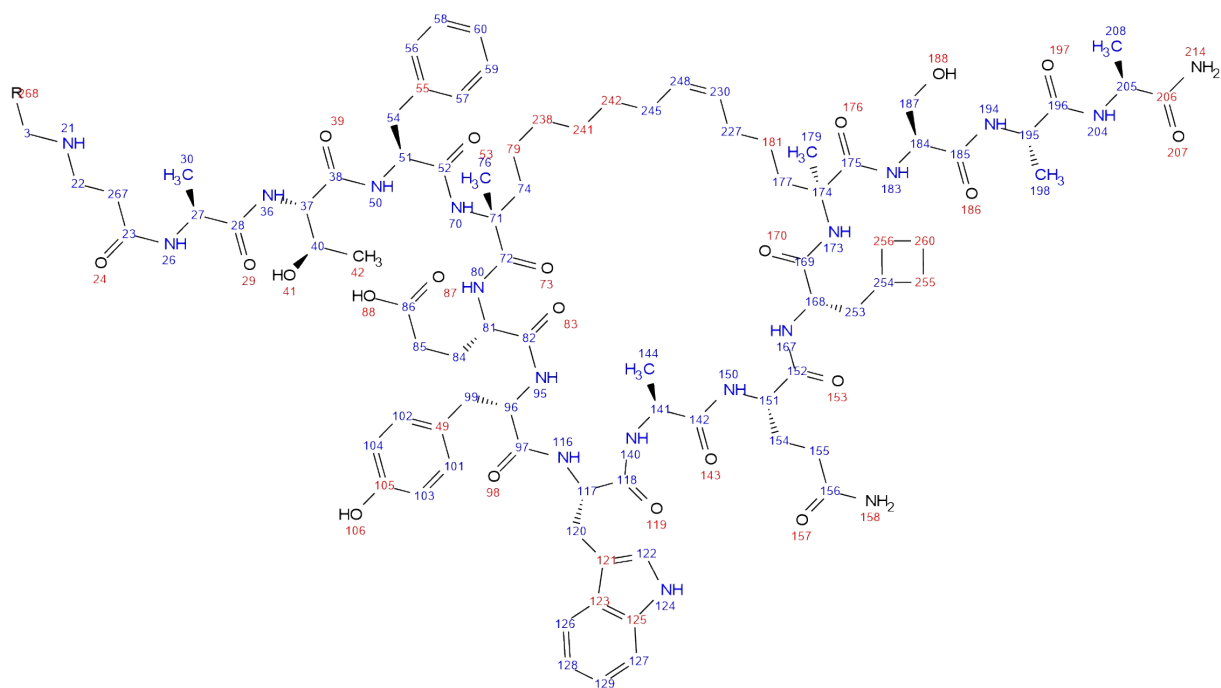

Figure S11.  $^1\text{H}$  spectra using excitation sculpting for water suppression of **1**

1D-zgesgp — 1H,599.56 MHz — in CD3CN @313.0K

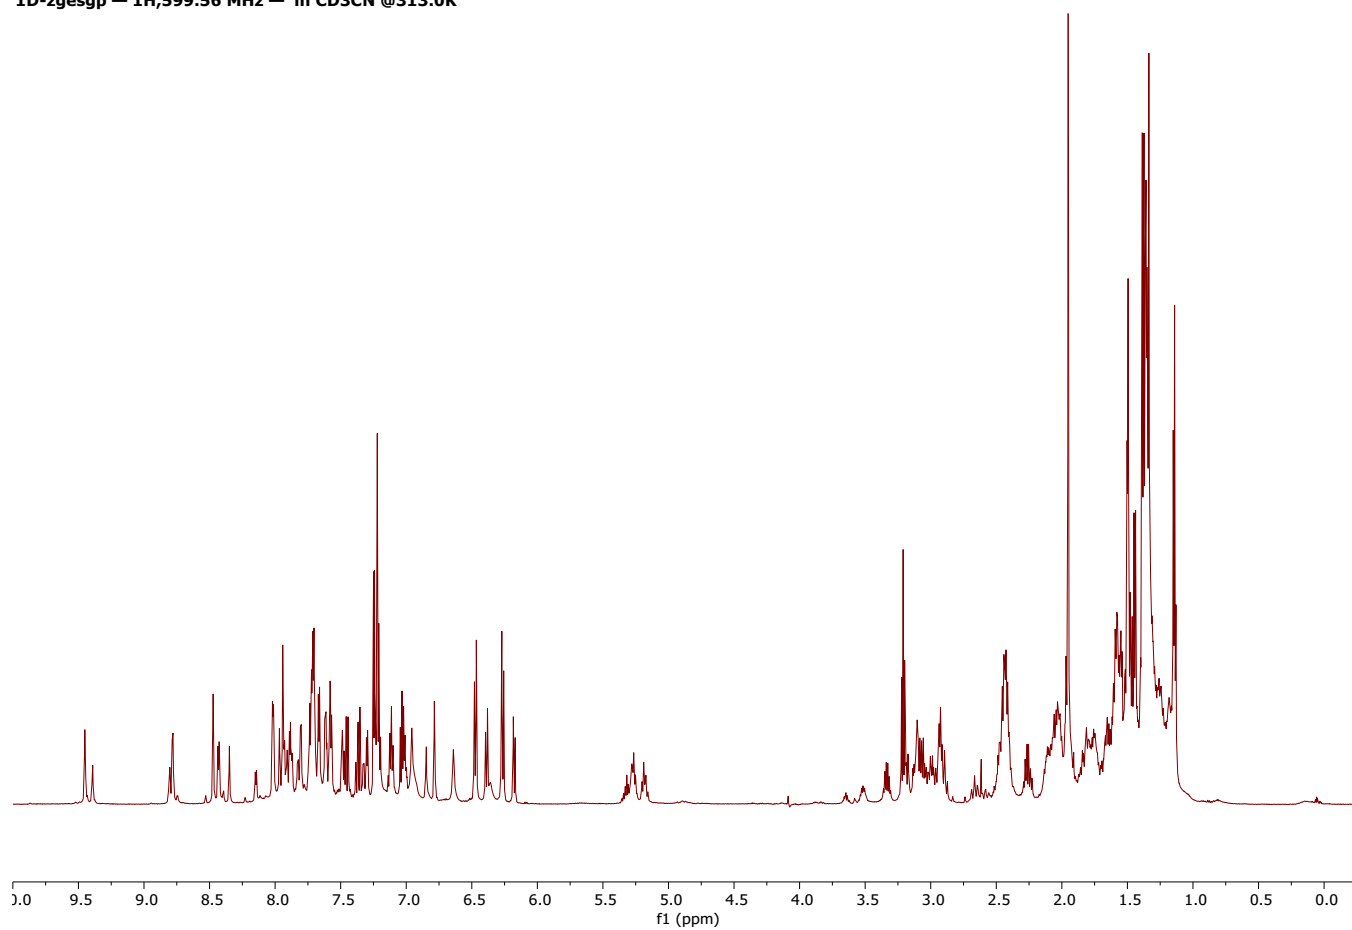

Figure S12.  $^1\text{H}$  spectra using excitation sculpting for water suppression of **1** zoomed to the amide NH region with  $^3J_{\text{NH}/\text{H}-\alpha}$  indicated

1D-zgesgp — 1H,599.56 MHz — in CD3CN @313.0K

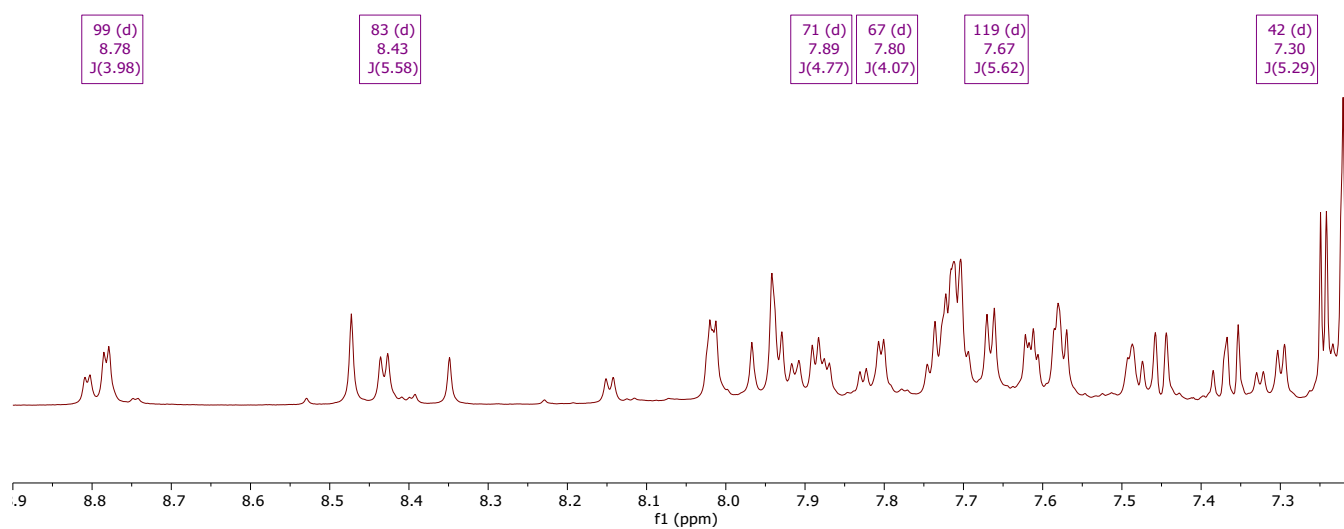



Figure S13. Broadband homo-decoupled ME-HSQC using presaturation for water suppression of 1

2D-HSQC-EDITED-hsqcd\_bbhd\_pr —  $^{13}\text{C}, 150.76 \text{ MHz}/^1\text{H}, 599.56 \text{ MHz}$  — in  $\text{CD}_3\text{CN}$  @313.0K

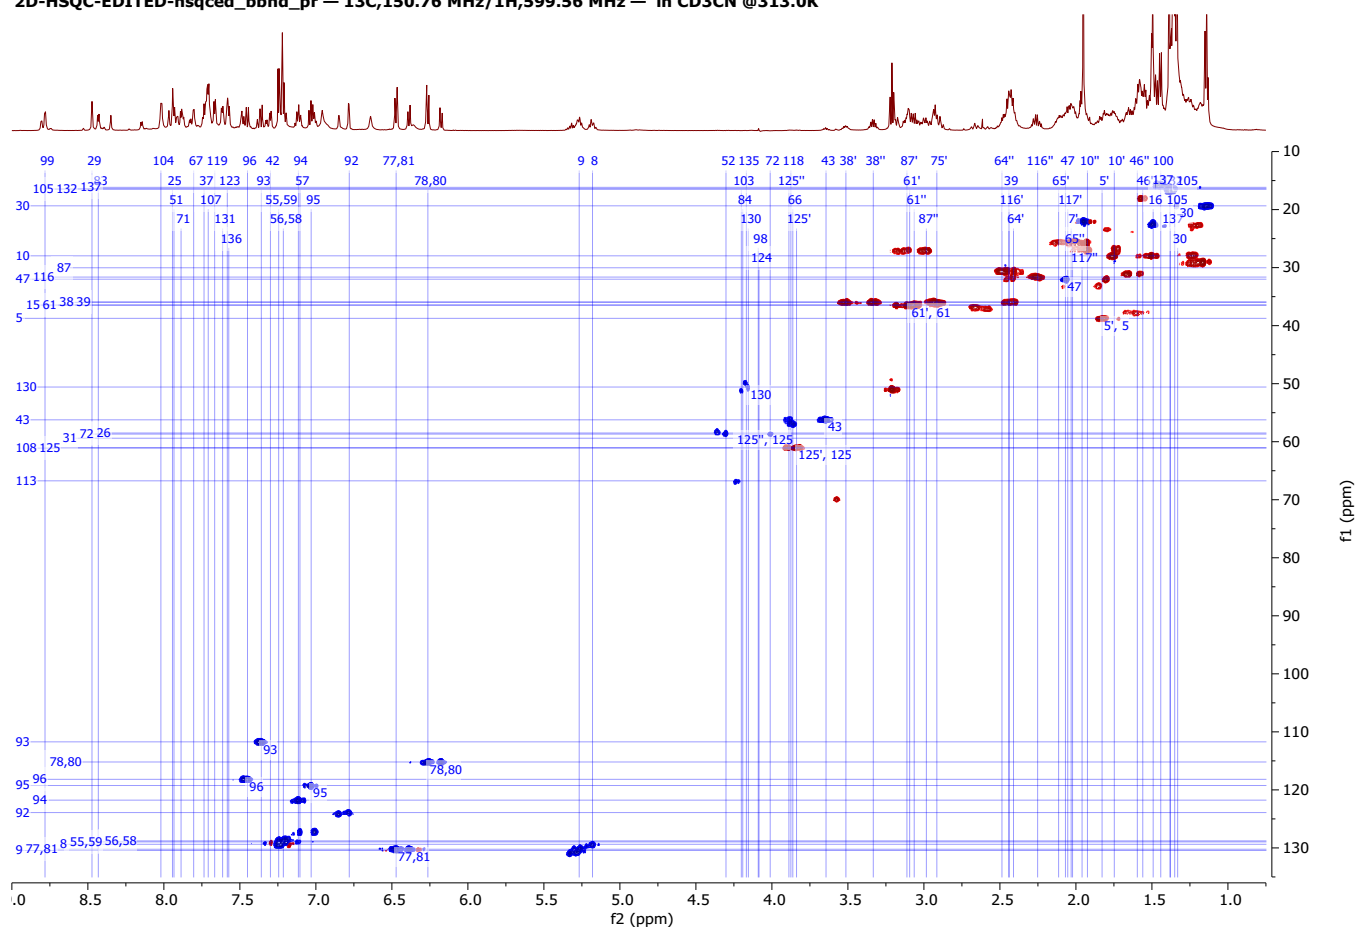

Figure S14. TOCSY using excitation sculpting for water suppression spectra of 1

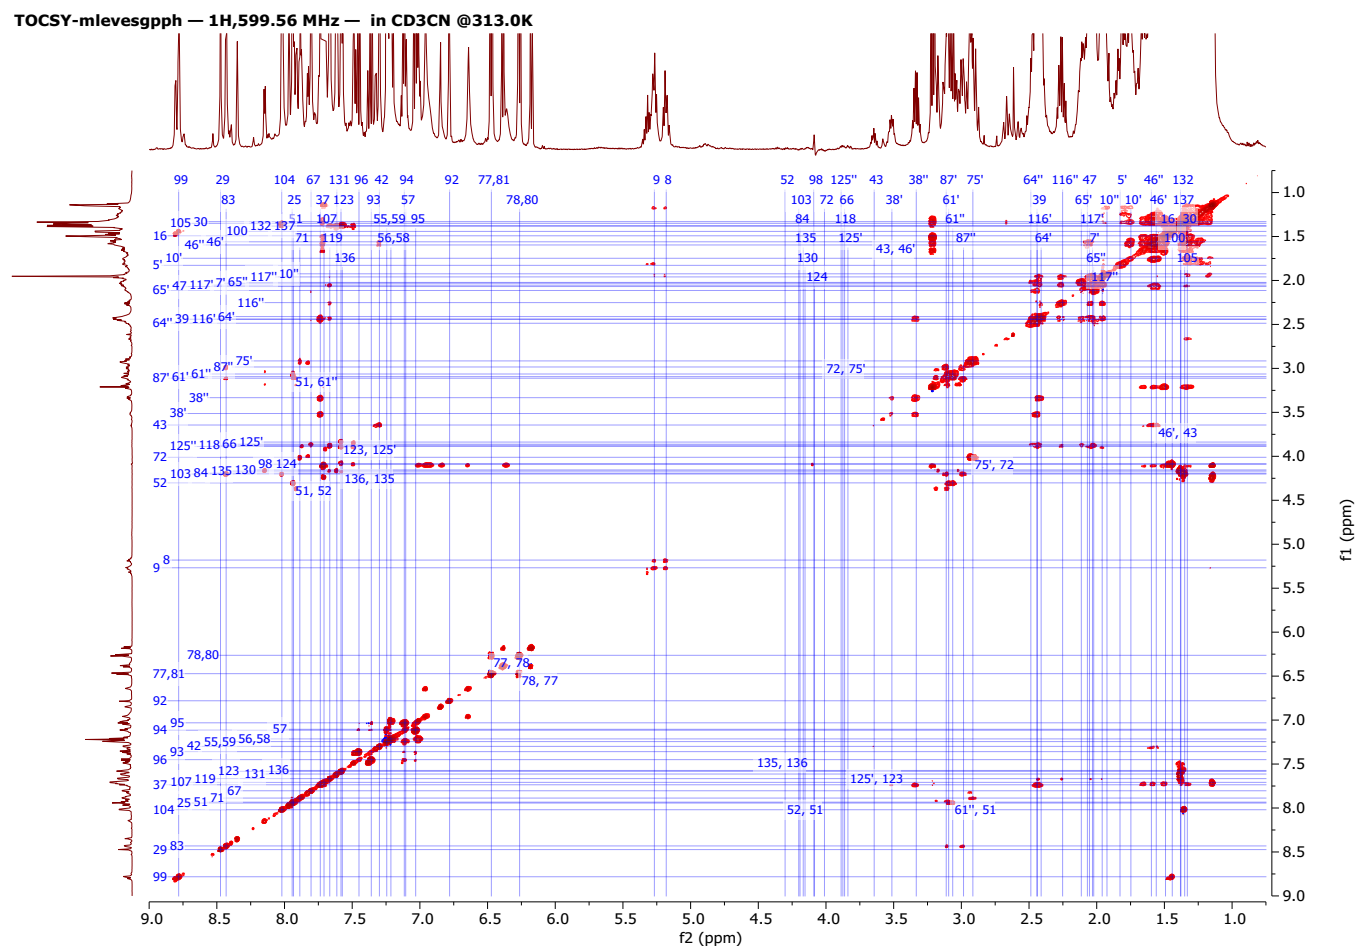



Figure S16. ROESY spectra using excitation sculpting for water suppression of **1** zoomed to the amide region demonstrating the quality of data obtained

ROESY-roesyesgpph — 1H,599.56 MHz — in CD3CN @313.0K

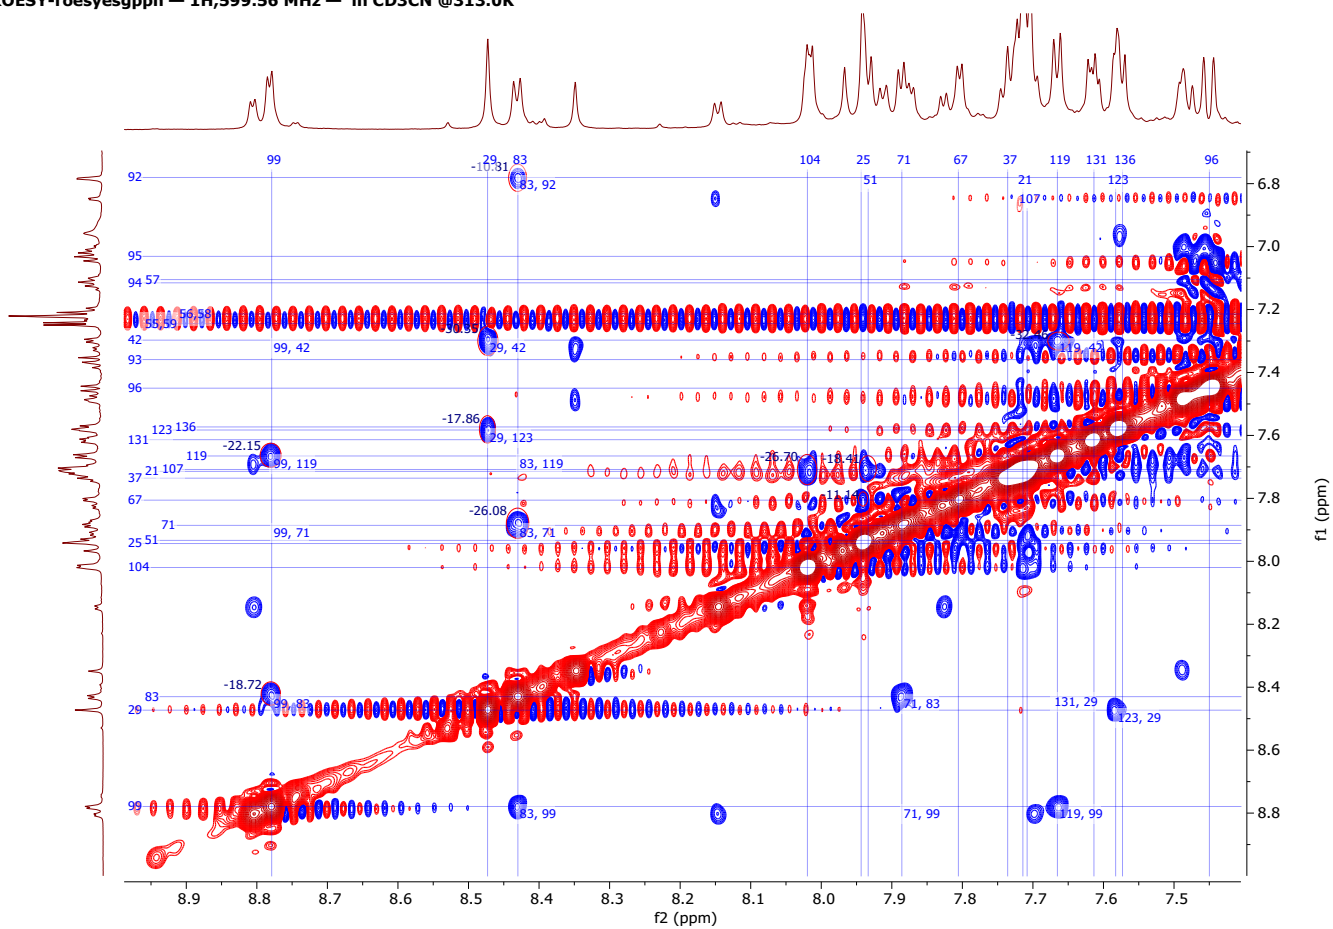



| type                | mnova numbers |     | NOE   | NOE distance (Å) | upper limit | forcegen input            |
|---------------------|---------------|-----|-------|------------------|-------------|---------------------------|
| NH/NH               | 173           | 183 | 17.86 | 3.04             | 3.04        | nmr 10 173 183 17.86 3.04 |
| NH/NH               | 140           | 116 | 18.72 | 3.02             | 3.02        | nmr 10 140 116 18.72 3.02 |
| NH/NH               | 140           | 150 | 22.15 | 2.93             | 2.93        | nmr 10 140 150 22.15 2.93 |
| NH/NH               | 116           | 95  | 23.9  | 2.90             | 2.90        | nmr 10 116 95 23.9 2.9    |
| NH/NH               | 173           | 167 | 30.35 | 2.78             | 2.78        | nmr 10 173 167 30.35 2.78 |
| NH/NH               | 167           | 150 | 32.46 | 2.75             | 2.75        | nmr 10 167 150 32.46 2.75 |
| NH/H $\alpha$ +3    | 116           | 51  | 3.25  | 4.04             | 4.04        | nmr 1 116 51 3.25 4.04    |
| NH/H $\alpha$ +3    | 140           | 81  | 14.82 | 3.14             | 3.14        | nmr 1 140 81 14.82 3.14   |
| NH/H $\alpha$ +3    | 194           | 168 | 18.42 | 3.02             | 3.02        | nmr 1 194 168 18.42 3.02  |
| NH/C $\alpha$ +2    | 167           | 117 | 30.74 | 2.78             | 2.78        | nmr 1 167 117 30.74 2.78  |
| NH/NH+2             | 167           | 183 | 18.72 | 3.02             | 3.02        | nmr 1 167 183 18.72 3.02  |
| inter NH/C $\alpha$ | 173           | 168 | 9.31  | 3.39             | 3.39        | nmr 1 173 168 9.31 3.39   |

Table ST1. ForceGen distance restraints utilized to generate a solution conformational ensemble. Distance restraints were derived as described in the text, with a 10% allowance for error added to the derived distance. The derived value is then divided between the distance and wiggle, setting the maximum distance to the derived distance with an energy penalty for exceeding this distance set to either 10 or 1 kcal/mol based on the confidence of the derived distance.

| $J$ (Hz) | NH  | N   | Ca  | Ha  | ForceGen Input                       |
|----------|-----|-----|-----|-----|--------------------------------------|
| 3.98     | 145 | 140 | 141 | 146 | torsion 0.3 -160 -90 145 140 141 146 |
| 5.58     | 130 | 116 | 117 | 131 | torsion 0.3 -160 -90 130 116 117 131 |
| 4.77     | 107 | 95  | 96  | 108 | torsion 0.3 -160 -90 107 95 96 108   |
| 4.07     | 89  | 80  | 81  | 90  | torsion 0.3 -160 -90 89 80 81 90     |
| 5.62     | 159 | 150 | 151 | 160 | torsion 0.3 -160 -90 159 150 151 160 |
| 5.29     | 171 | 167 | 168 | 172 | torsion 0.3 -160 -90 171 167 168 172 |
| 4.07     | 189 | 183 | 184 | 190 | torsion 0.3 -160 -90 189 183 184 190 |
| 5.70     | 61  | 50  | 51  | 62  | torsion 0.3 -160 -90 61 50 51 62     |

Table ST2. ForceGen restraints derived from with  $^3J_{\text{NH/H-}\alpha}$  (column 1) with corresponding torsion atom assignment numbers included. All measured  $^3J_{\text{NH/H-}\alpha}$  were found to be below 6 Hz corresponding to a dihedral angle which could on a peptide specific Karplus curve fall in a range between -160 to -90 degrees.<sup>1</sup> The torsion restraints were set conservatively for this entire range.



| Cnum | NViol | MeanViol | Constraint                           |
|------|-------|----------|--------------------------------------|
| 0    | 0     | 0.0000   | nmr 10 1.52 1.52 178 189             |
| 1    | 0     | 0.0000   | nmr 10 1.51 1.51 145 130             |
| 2    | 0     | 0.0000   | nmr 10 1.47 1.47 145 159             |
| 3    | 0     | 0.0000   | nmr 10 1.45 1.45 130 107             |
| 4    | 0     | 0.0000   | nmr 10 1.39 1.39 178 171             |
| 5    | 0     | 0.0000   | nmr 10 1.38 1.38 171 159             |
| 6    | 452   | 0.1561   | nmr 1 2.02 2.02 130 62               |
| 7    | 0     | 0.0000   | nmr 1 1.57 1.57 145 90               |
| 8    | 15    | 0.0525   | nmr 1 1.51 1.51 199 172              |
| 9    | 858   | 0.3380   | nmr 1 1.39 1.39 171 131              |
| 10   | 965   | 0.5415   | nmr 1 1.51 1.51 171 189              |
| 11   | 0     | 0.0000   | nmr 1 1.69 1.69 168 172              |
| 12   | 0     | 0.0000   | torsion 0.3 -160 -90 145 140 141 146 |
| 13   | 0     | 0.0000   | torsion 0.3 -160 -90 130 116 117 131 |
| 14   | 0     | 0.0000   | torsion 0.3 -160 -90 107 95 96 108   |
| 15   | 0     | 0.0000   | torsion 0.3 -160 -90 89 80 81 90     |
| 16   | 0     | 0.0000   | torsion 0.3 -160 -90 159 150 151 160 |
| 17   | 0     | 0.0000   | torsion 0.3 -160 -90 171 167 168 172 |
| 18   | 0     | 0.0000   | torsion 0.3 -160 -90 189 183 184 190 |
| 19   | 0     | 0.0000   | torsion 0.3 -160 -90 61 50 51 62     |

Table ST3. Forcegen constraint violation report for **1**

Figure S18. Backbone cartoon, colored by residue type, of the 100 lowest energy + violation energy conformers (out of 995 total conformers) generated by ForceGen based on distance and torsion restraints (Tables S1 & S2).<sup>2,3</sup>

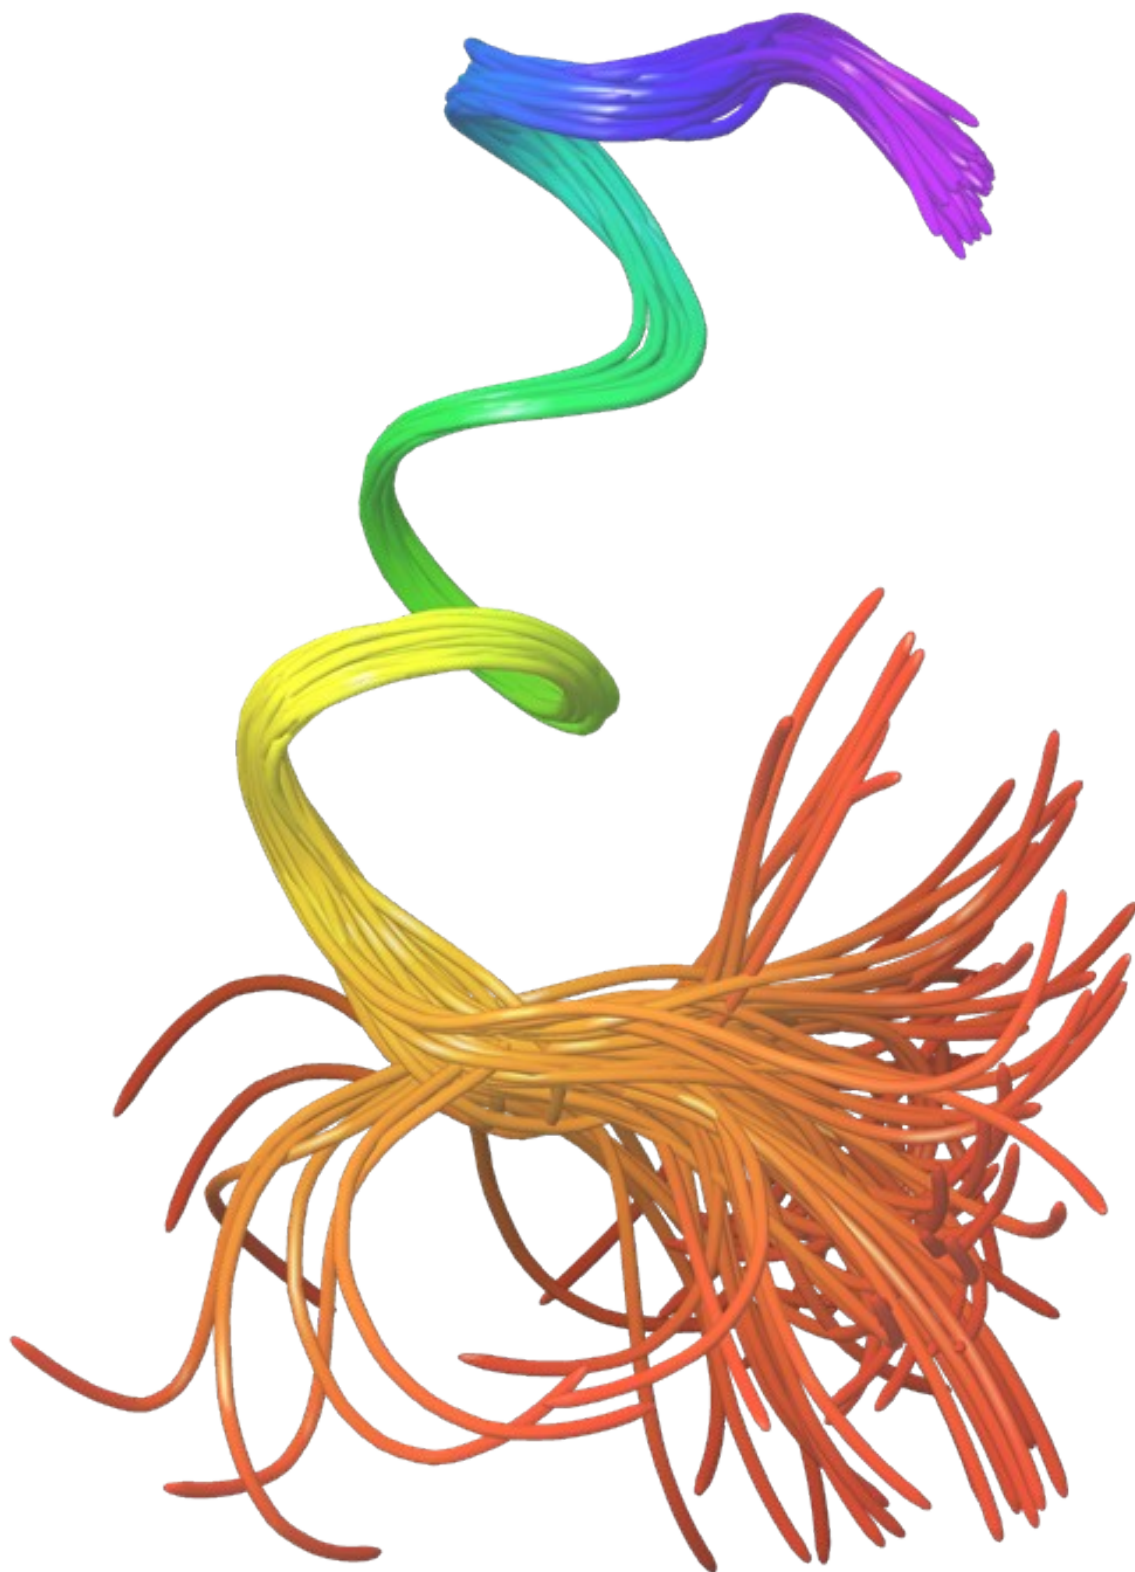

Figure S19. Best 100 conformers with lowest total energy (force field energy + restraint violation) generated by ForceGen, with line bond representation. Backbone is shown in blue and the staple linker is shown in grey.

All 100 structures are aligned using backbone heavy atoms of residues 4 through 16. Pairwise RMSD values are measured for every pair of structures within the ensemble. Mean pairwise RMSD for the backbone heavy atoms is  $0.72 \pm 0.38$  Å and mean pairwise RMSD for all heavy atoms is  $1.22 \pm 0.63$  Å.

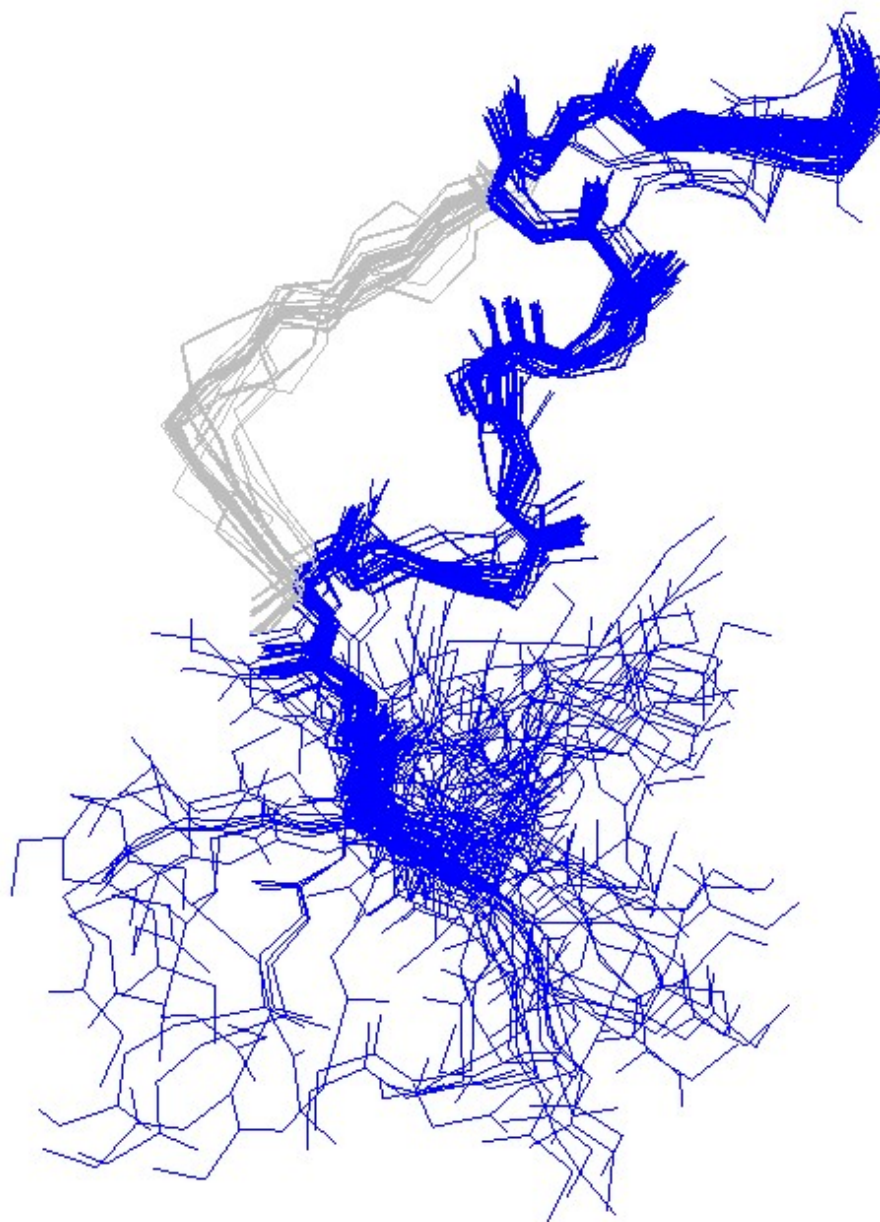

Figure S20. Bradykinin, used as a negative control for SEC-HDX-MS experiments, possesses 17 solvent accessible labile protons and has been demonstrated to possess no secondary structure.<sup>5-7</sup>

| Compound name | Molecular weight, Dalton | Number of amino acids <sup>1</sup> | % $\alpha$ -helix in the native structure <sup>*</sup> | Number of solvent inaccessible labile protons <sup>**</sup> | Number of solvent accessible labile protons <sup>**</sup> | Calculated total number of labile protons <sup>+</sup> | Measured total number of labile protons <sup>***</sup><br>In 0.1%TFA/ 1.6 M GndCl at pH 7 |
|---------------|--------------------------|------------------------------------|--------------------------------------------------------|-------------------------------------------------------------|-----------------------------------------------------------|--------------------------------------------------------|-------------------------------------------------------------------------------------------|
| Bradykinin    | 1060                     | 9                                  | 0                                                      | 0                                                           | 17                                                        | 17                                                     | 17/17                                                                                     |

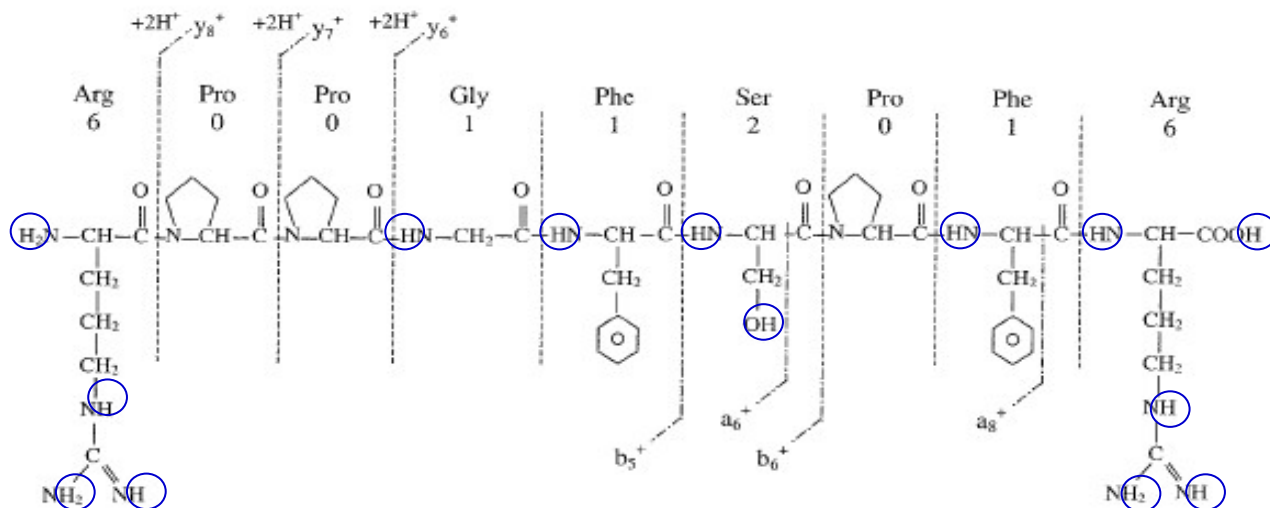

- 17 total solvent-accessible labile protons
- No higher-order structure to restrict HDX

Figure S21. An Acquity UPLC® Protein BEH SEC-125 4.6 × 150 mm, 1.7 μm column with 125 Å pore size from Waters was used. The mobile phase A was 50 mM ammonium formate in water with an addition of TFA to adjust pH to 2.0, and organic mobile phase B was acetonitrile. Bradykinin samples were fully labelled in deuterium oxide than injected at 1 μL onto the SEC column with a flow rate of 0.25 mL/min at different percentage of organic modifier (5%, 25%, 50% B) and at column temperatures (25 °C) during isocratic separation. The total run time was 10 minutes.

Bradykinin (control): Elution time and ΔHDX at different %MeCN

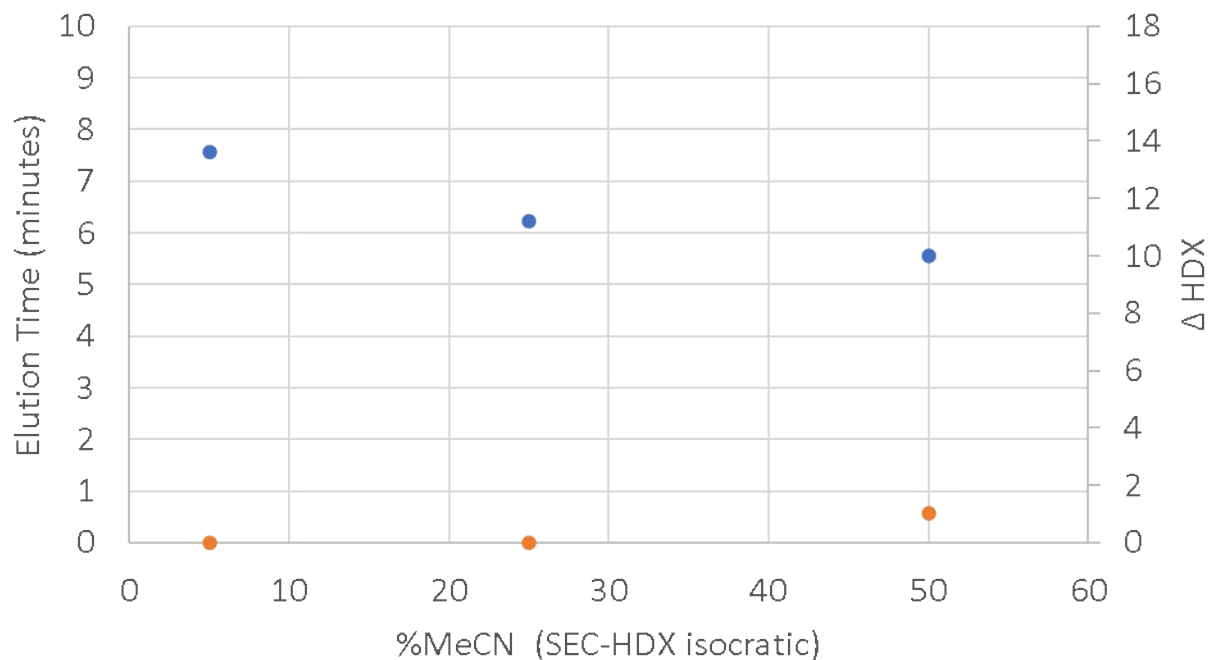

Figure S22. An Acquity UPLC® Protein BEH SEC-125 4.6 × 150 mm, 1.7 μm column with 125 Å pore size from Waters was used. The mobile phase A was 50 mM ammonium formate in water with an addition of TFA to adjust pH to 2.0, and organic mobile phase B was acetonitrile. Bradykinin samples were fully labelled in deuterium oxide than injected at 1 μL onto the SEC column with a flow rate of 0.25 mL/min at 5% B and at column temperatures (25 °C) during isocratic separation. The total run time was 10 minutes.

Bradykinin D20 – 5% B iso.

Bradykinin D20

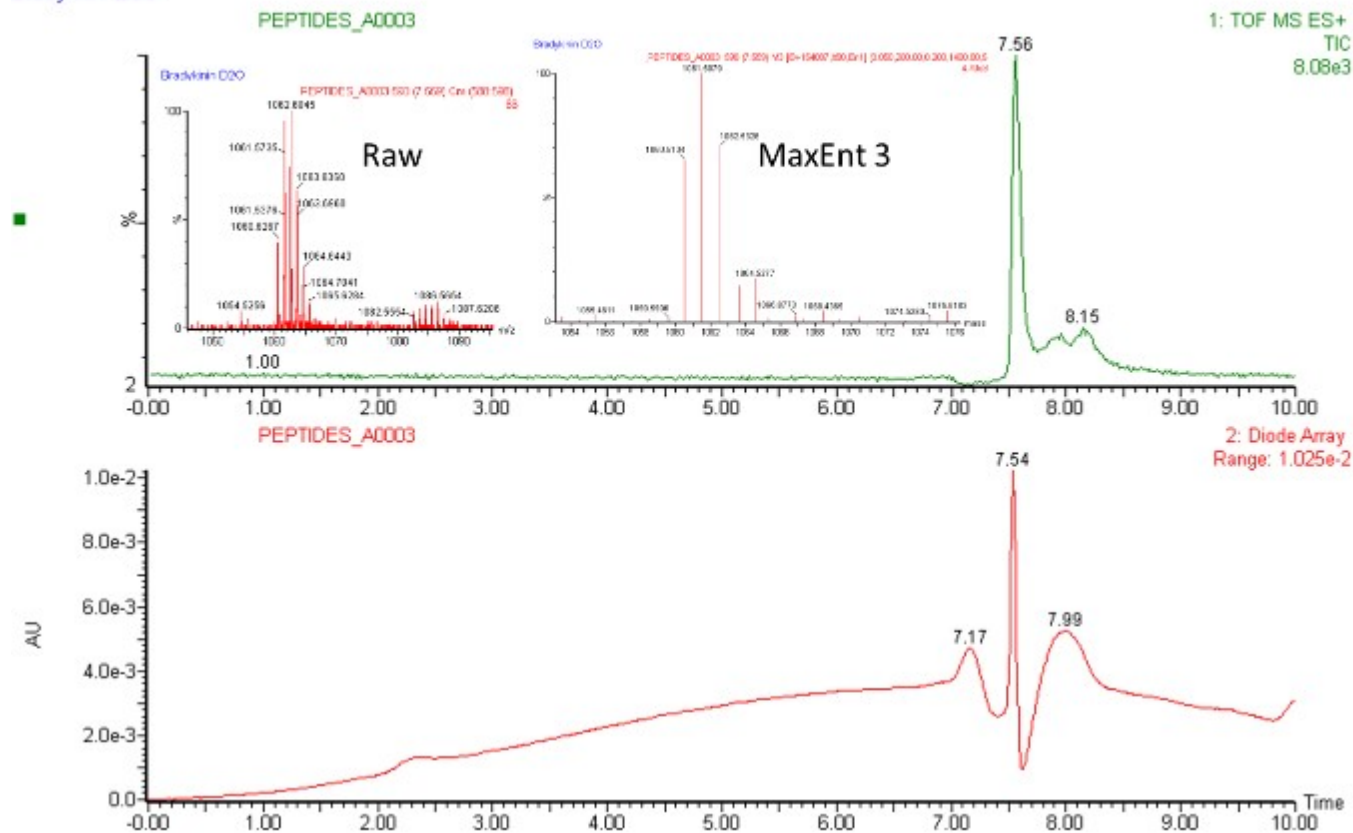



Figure S23. An Acquity UPLC® Protein BEH SEC-125 4.6 × 150 mm, 1.7 μm column with 125 Å pore size from Waters was used. The mobile phase A was 50 mM ammonium formate in water with an addition of TFA to adjust pH to 2.0, and organic mobile phase B was acetonitrile. Bradykinin samples were fully labelled in deuterium oxide than injected at 1 μL onto the SEC column with a flow rate of 0.25 mL/min at 25% B and at column temperatures (25 °C) during isocratic separation. The total run time was 10 minutes.

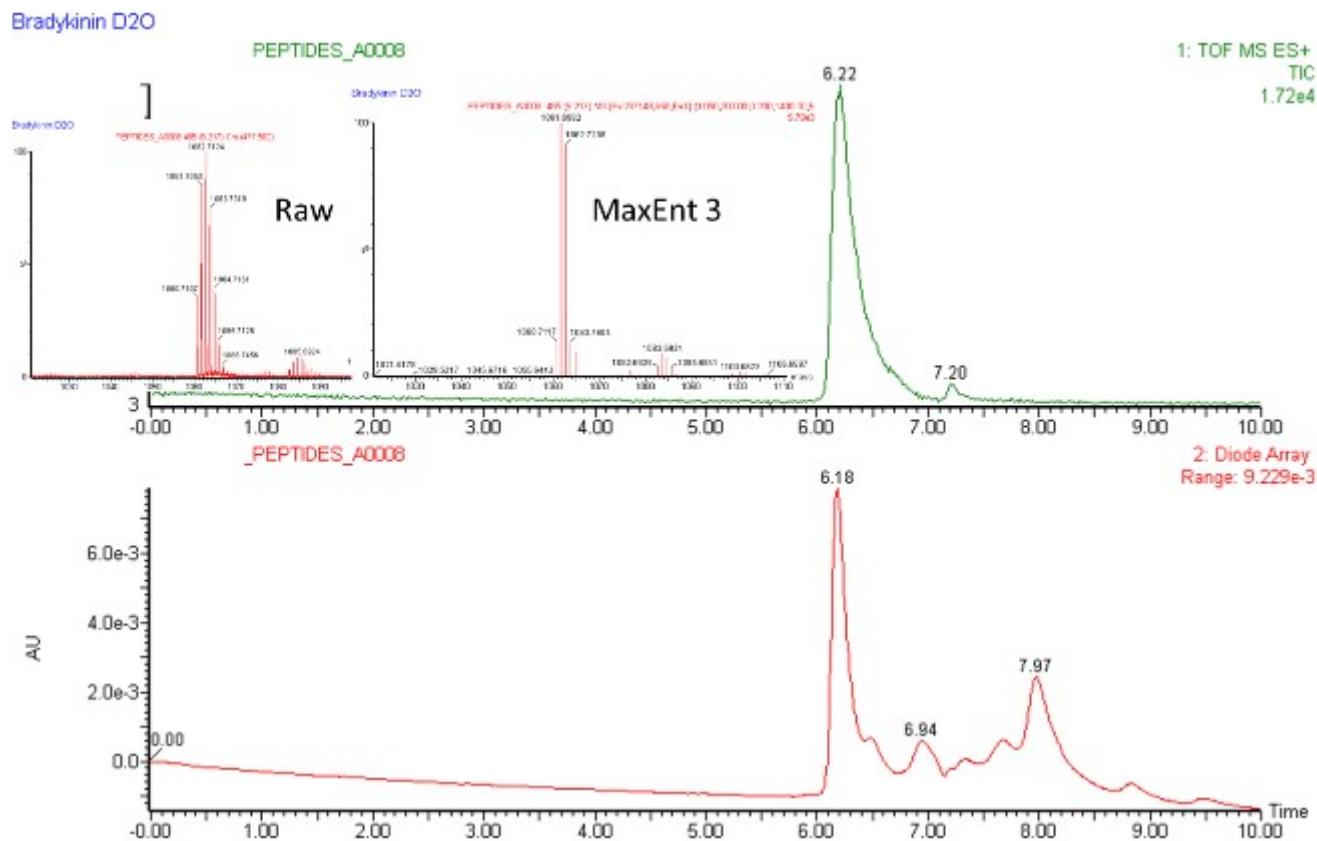

Figure S24. An Acquity UPLC® Protein BEH SEC-125 4.6 × 150 mm, 1.7 μm column with 125 Å pore size from Waters was used. The mobile phase A was 50 mM ammonium formate in water with an addition of TFA to adjust pH to 2.0, and organic mobile phase B was acetonitrile. Bradykinin samples were fully labelled in deuterium oxide than injected at 1 μL onto the SEC column with a flow rate of 0.25 mL/min at 50% B and at column temperatures (25 °C) during isocratic separation. The total run time was 10 minutes.

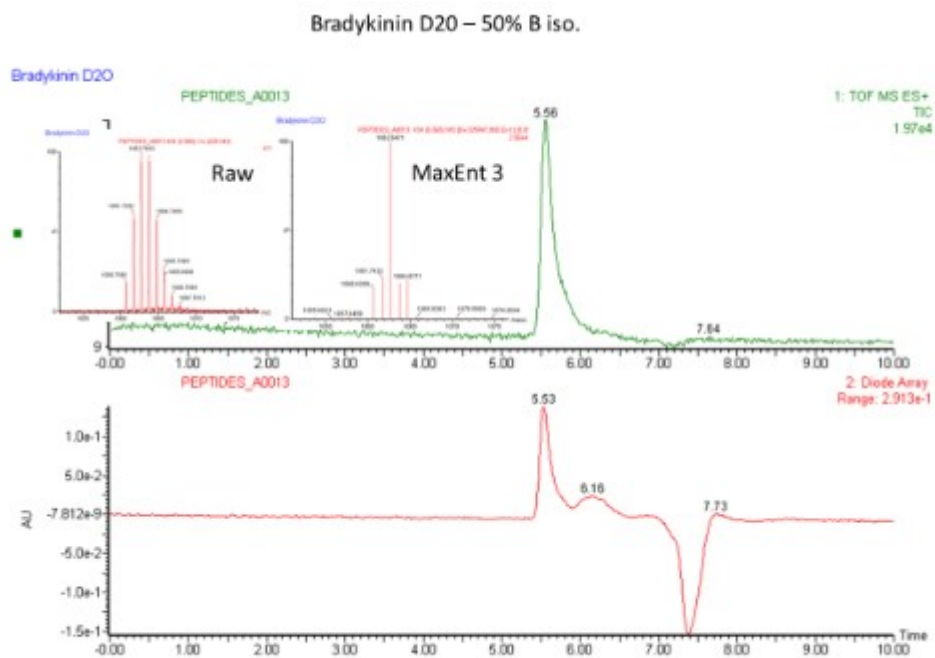

Figure S25. Overlaid  $^1\text{H}/^{15}\text{N}$ -HSQC spectra of peptide **1** at 303, 313, 323, and 333K

$^1\text{H}/^{15}\text{N}$  (599.56/60.75 MHz) hsqcedetgp @ 303,313,323,333 K

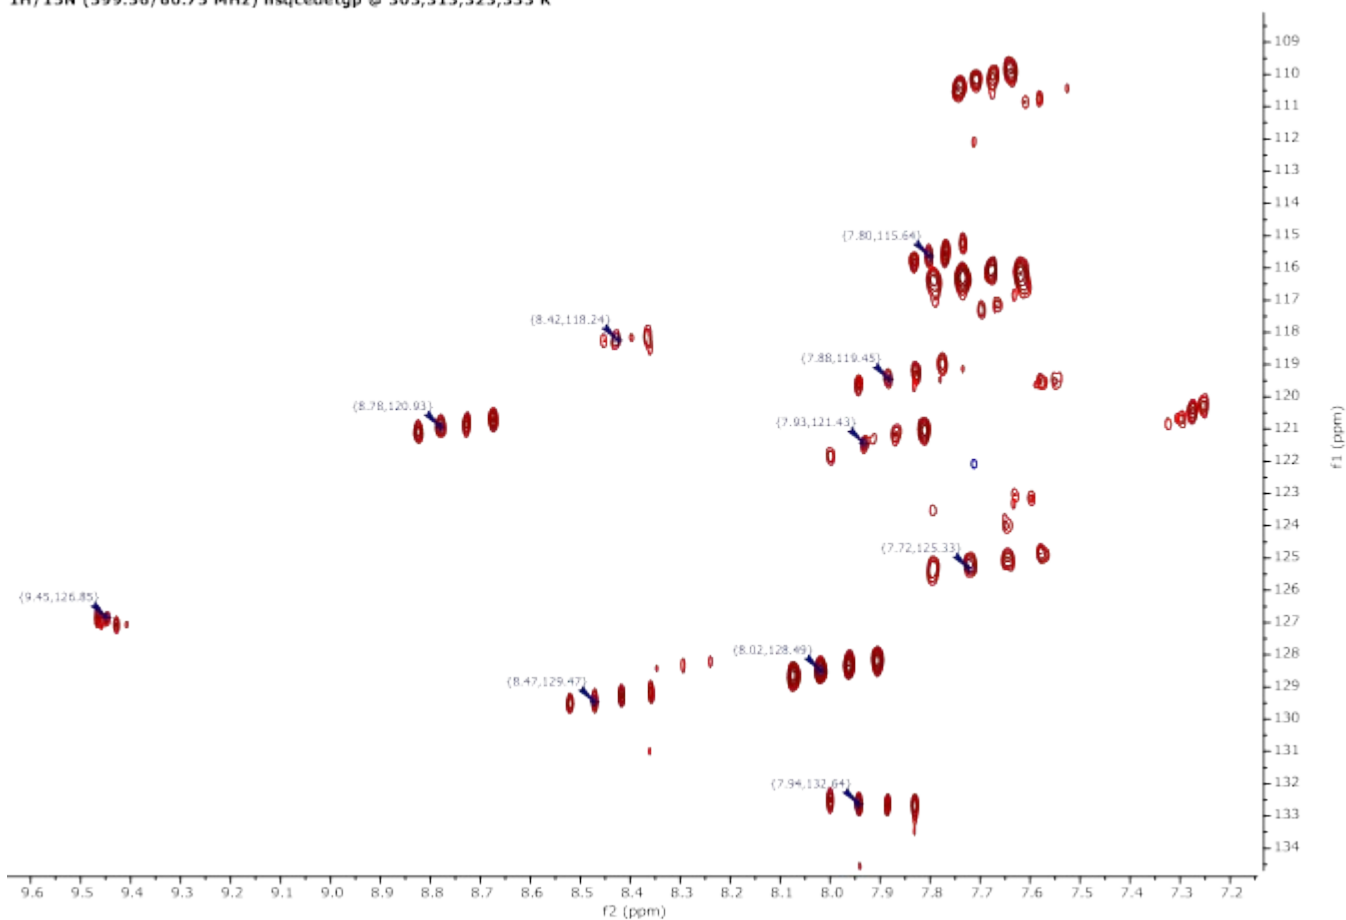

| residue # | 1     | 2     | 3     | 4     | 5     | 6     | 7     | 8     | 9     | 10    | 11    | 12    | 13    | 14    | 15    | 16    |      |
|-----------|-------|-------|-------|-------|-------|-------|-------|-------|-------|-------|-------|-------|-------|-------|-------|-------|------|
| residue   | R     | Gly   | Ala   | Thr   | Phe   | Lnk   | Glu   | Tyr   | Trp   | Ala   | Gln   | Cpr   | Lnk   | Ser   | Ala   | Ala   |      |
| deg. K    | 303   | 7.79  | 7.79  | 8.07  | 7.74  | 8.00  | 8.00  | 7.83  | 7.94  | 8.45  | 8.82  | 7.70  | 7.32  | 8.52  | 7.61  | 7.63  | 7.59 |
| 313       | 7.72  | 7.73  | 8.02  | 7.71  | 7.93  | 7.94  | 7.80  | 7.88  | 8.42  | 8.78  | 7.66  | 7.30  | 8.47  | 7.58  | 7.61  | 7.57  |      |
| 323       | 7.65  | 7.68  | 7.96  | 7.68  | 7.87  | 7.89  | 7.77  | 7.83  | 8.40  | 8.73  | 7.63  | 7.28  | 8.42  | 7.55  | 7.60  | 7.56  |      |
| 333       | 7.58  | 7.62  | 7.91  | 7.64  | 7.81  | 7.83  | 7.73  | 7.78  | 8.36  | 8.67  | 7.62  | 7.25  | 8.36  | 7.55  | 7.60  | 7.56  |      |
| ppb/K     | -7.00 | -5.67 | -5.33 | -3.33 | -6.33 | -5.67 | -3.33 | -5.33 | -3.00 | -5.00 | -2.67 | -2.33 | -5.33 | -2.00 | -1.00 | -1.00 |      |

Table ST4. Temperature coefficients derived from  $^1\text{H}/^{15}\text{N}$ -HSQC spectra.

## References

1. F. Li, J. H. Lee, A. Grishaev, J. Ying and A. Bax, *ChemPhysChem*, 2015, **16**, 572-578.
2. A. E. Cleves and A. N. Jain, *Journal of Computer-Aided Molecular Design*, 2017, **31**, 419-439.
3. A. N. Jain, A. E. Cleves, Q. Gao, X. Wang, Y. Liu, E. C. Sherer and M. Y. Reibarkh, *Journal of Computer-Aided Molecular Design*, 2019, **33**, 531-558.
4. C. Bannwarth, S. Ehlert and S. Grimme, *Journal of Chemical Theory and Computation*, 2019, **15**, 1652-1671.
5. A. A. Makarov and R. Helmy, *Journal of Chromatography A*, 2016, **1431**, 224-230.
6. N. A. Pierson, A. A. Makarov, C. A. Strulson, Y. Mao and B. Mao, *Journal of Chromatography A*, 2017, **1496**, 51-57.
7. N. M. Schiavone, G. F. Pirrone, E. D. Guetschow, I. Mangion and A. A. Makarov, *Talanta*, 2019, **194**, 177-182.
